# Supplementary material for: Exploring the limits of adsorption-based CO2 capture using MOFs with PVSA – from molecular design to process economics
Source: Royal Society of Chemistry journal article supplement (doi:10.1039/c9me00102f), 2019-09-23
Supplement: c9me00102f2.xlsx [file c9me00102f2.xlsx]

## Sheet: Introduction
	Associated content for:
	Exploring the limits of adsorption-based CO2 capture using MOFs with PVSA – from molecular design to process economics
	D. Danaci, M. Bui, N. Mac Dowell, C. Petit
	Digitised adsorption data
	Data points from graph digitisation
	Pressure (P) in bar
	Loading (n) in mol/kg
	Temperature (T) in K

## Sheet: Data
Ni-MOF-74							MOF-505							MOF-505@GO							Mixed Ligand Co MOF							MIL-101(Cr)							Zn(BPDC)(BPP)							ZIF-8							ED-ZIF-8
DOI: 10.1039/b911242a							DOI: 10.1016/j.cej.2016.09.138							DOI: 10.1016/j.cej.2016.09.138							DOI: 10.1021/ic502733v							DOI: 10.1016/j.cej.2012.04.071							DOI: 10.1039/C5CC05867H							DOI: 10.1002/aic.13970							DOI: 10.1002/aic.13970
CO2			N2				CO2			N2				CO2			N2				CO2			N2				CO2			N2				CO2			N2				CO2			N2				CO2
P	n	T	P	n	T		P	n	T	P	n	T		P	n	T	P	n	T		P	n	T	P	n	T		P	n	T	P	n	T		P	n	T	P	n	T		P	n	T	P	n	T		P
0.0122184	2.46306	278	1.74459	1.72845	298		0.0664	0.843	278	0.0389	0.0413	278		0.0632	1.09	278	0.0389	0.0413	278		0.0161	0.175337	273	0.0705	0.0311859	273		0.0363144	0.328831	288	0.116376	0.02241	288		0.0267273	0.0997052	273	0.662153	0.0708618	273		0.0458	0.0572727	298	0.0115	0.0150357	298		0.554
0.0122184	2.42548	278	2.22069	1.87133	298		0.125	1.33	278	0.0644	0.0265	278		0.121	1.74	278	0.0644	0.0265	278		0.0335	0.315428	273	0.107	0.0486303	273		0.0698736	0.517012	288	0.139162	0.0301778	288		0.039252	0.1385	273	1.16449	0.0911655	273		0.585	0.311364	298	1.11	0.0867857	298		1.09
0.0122184	2.39098	278	2.53857	2.10814	298		0.164	1.58	278	0.0754	0.0411	278		0.162	2.08	278	0.0754	0.0411	278		0.0684	0.597841	273	0.179	0.0771839	273		0.0891354	0.604732	288	0.161727	0.0347047	288		0.0549078	0.175531	273	1.67905	0.108212	273		1.06	0.513636	298	3.09	0.301786	298		3.12
0.0122184	2.35648	278	2.54401	2.01587	298		0.216	1.88	278	0.0919	0.041	278		0.215	2.42	278	0.0919	0.041	278		0.106	0.887838	273	0.211	0.0945837	273		0.115818	0.708408	288	0.18276	0.0422708	288		0.0705636	0.210798	273	3.19247	0.15935	273		5.02	2.22955	298	5.1	0.521429	298		5.17
0.0122184	2.31612	278	2.57773	2.20082	298		0.269	2.13	278	0.111	0.0605	278		0.268	2.73	278	0.111	0.0605	278		0.141	1.07076	273	0.283	0.122691	273		0.13905	0.788166	288	0.204961	0.0498393	288		0.0862195	0.239012	273	3.70703	0.176397	273		10.1	3.56818	298	10.1	1.05	298		8.09
0.0123758	2.50686	278	2.93364	2.28871	298		0.32	2.36	278	0.146	0.075	278		0.319	3.02	278	0.146	0.075	278		0.176	1.27153	273	0.318	0.138306	273		0.161295	0.861544	288	0.229501	0.057413	288		0.101875	0.272516	273	4.22159	0.193443	273		15.1	4.27273	298	15.2	1.59286	298		11.1
0.0130107	2.56313	278	3.20113	2.39376	298		0.371	2.56	278	0.18	0.0944	278		0.368	3.25	278	0.18	0.0944	278		0.209	1.44999	273	0.35	0.153476	273		0.184534	0.930143	288	0.285592	0.0725755	288		0.126925	0.311311	273	4.70588	0.193443	273		20.1	4.63636	298	20.2	2.11429	298		15.1
0.0136554	2.60147	278	3.28209	2.61689	298		0.423	2.76	278	0.216	0.129	278		0.421	3.49	278	0.216	0.129	278		0.245	1.61952	273	0.386	0.170875	273		0.206786	0.993957	288	0.343318	0.0808326	288		0.173892	0.360685	273	5.24677	0.209888	273		25.2	4.93182	298	25.2	2.65357	298		20.1
0.0141653	2.63106	278	3.40022	2.48946	298		0.474	2.93	278	0.251	0.143	278		0.474	3.7	278	0.251	0.143	278		0.281	1.76675	273	0.422	0.183814	273		0.228545	1.05458	288	0.399797	0.0937082	288		0.299139	0.538786	273	5.72874	0.209888	273		0.0199	0.0368182	308	1.18	0.0771429	308		25.2
0.0147239	2.66847	278	4.54984	2.99428	298		0.527	3.11	278	0.286	0.148	278		0.525	3.91	278	0.286	0.148	278		0.316	1.90952	273	0.457	0.196306	273		0.282459	1.18861	288	0.456772	0.104991	288		0.559026	0.773316	273	6.23422	0.223129	273		0.503	0.281818	308	3.15	0.273214	308		1.06
0.0149506	2.88624	278	5.53757	3.37024	298		0.579	3.27	278	0.323	0.162	278		0.577	4.1	278	0.323	0.162	278		0.351	2.04337	273	0.492	0.211029	273		0.343306	1.32902	288	0.514737	0.11787	288		0.290323	0.195266	313	6.76413	0.227535	273		1.07	0.415909	308	5.03	0.460714	308		3.15
0.0150012	2.84243	278	6.62237	3.69493	298		0.631	3.43	278	0.394	0.196	278		0.63	4.28	278	0.394	0.196	278		0.385	2.17721	273	0.526	0.225306	273		0.401192	1.4519	288	0.570226	0.129149	288		0.548387	0.323964	313	7.24842	0.227535	273		5.08	1.60682	308	10.2	0.910714	308		5.05
0.0150518	2.80485	278	7.70634	3.97691	298		0.684	3.57	278	0.5	0.249	278		0.681	4.46	278	0.5	0.249	278		0.42	2.28875	273	0.632	0.270813	273		0.45463	1.55882	288	0.626706	0.14043	288		1.07252	0.509658	313	8.27755	0.227535	273		10.1	2.88636	308	15.2	1.43214	308		8.1
0.0150518	2.77035	278	8.88772	4.22472	298		0.736	3.71	278	0.572	0.298	278		0.733	4.63	278	0.572	0.298	278		0.455	2.39582	273	0.666	0.285536	273		0.511536	1.66575	288	0.68368	0.153307	288		1.59856	0.64678	313	8.79211	0.227535	273		15.1	3.75	308	20.2	1.90357	308		11.2
0.0151538	2.94247	278	10.0684	4.43835	298		0.787	3.85	278	0.644	0.312	278		0.786	4.79	278	0.644	0.312	278		0.49	2.51182	273	0.701	0.299813	273		0.568444	1.77109	288	0.740161	0.162994	288		2.12461	0.761048	313	9.24613	0.227535	273		20.2	4.20455	308	25.2	2.37143	308		15.1
0.0155487	2.98231	278	11.2485	4.6178	298		0.839	3.98	278	0.714	0.351	278		0.837	4.95	278	0.714	0.351	278		0.524	2.60998	273	0.735	0.314536	273		0.625357	1.86845	288	0.797135	0.175871	288		0.301075	0.284024	298	9.97257	0.244581	273		25.1	4.5	308	0.0462	0.0055	318		20.1
0.0159745	3.01338	278	14.5903	5.03655	298		0.892	4.11	278	0.821	0.414	278		0.89	5.1	278	0.821	0.414	278		0.559	2.70813	273	0.769	0.329258	273		0.681777	1.96263	288	0.85411	0.187153	288		0.548387	0.457101	298	1.10753	0.0177515	313		0.0197	0.0336364	318	1.07	0.0532143	318		25.1
0.0165759	3.04915	278	17.9298	5.33569	298		0.943	4.22	278	0.89	0.434	278		0.942	5.24	278	0.89	0.434	278		0.629	2.89105	273	0.804	0.343535	273		0.738202	2.05043	288	0.910094	0.198434	288		1.07527	0.696746	298	1.63441	0.0221893	313		0.621	0.192955	318	3.15	0.220714	318		0.554
0.0172064	3.10986	278	21.4645	5.58358	298		0.996	4.34	278	0.973	0.482	278		0.996	5.39	278	0.973	0.482	278		0.663	2.98028	273	0.838	0.358258	273		0.794134	2.13504	288	0.96707	0.209716	288		1.5914	0.865385	298	2.17204	0.0221893	313		1.14	0.379545	318	5.15	0.407143	318		1.18
0.0175311	3.14973	278	24.9978	5.76311	298		0.0585	0.55	288	0.996	0.467	278		0.0656	0.818	288	0.996	0.467	278		0.698	3.06951	273	0.872	0.372981	273		0.852046	2.22125	288	1.02355	0.220998	288		2.11828	1.0784	298	2.67742	0.0266272	313		5.1	1.44773	318	10.2	0.821429	318		3.09
0.0177082	3.1873	278	32.0631	6.05383	298		0.125	0.996	288	0.0386	0.0293	288		0.123	1.33	288	0.0386	0.0293	288		0.732	3.14982	273	0.94	0.402873	273		0.906991	2.29948	288	1.07953	0.232278	288					3.23656	0.0266272	313		10.1	2.65909	318	15.2	1.30357	318		5.08
0.0179837	3.2311	278	35.693	6.15647	298		0.163	1.23	288	0.0634	0.0387	288		0.161	1.58	288	0.0634	0.0387	288		0.767	3.2212	273	1.01	0.431427	273		0.964907	2.38091	288	1.13007	0.245141	288					3.74194	0.0266272	313		15.1	3.43182	318	20.2	1.75	318		8.13
0.0186776	3.28737	278	39.3229	6.25912	298		0.216	1.47	288	0.074	0.0386	288		0.215	1.95	288	0.074	0.0386	288		0.802	3.29258	273	1.05	0.450611	273		1.02183	2.45914	288	0.138613	0.0111725	303					4.25806	0.0310651	313		20.2	3.93182	318	25.3	2.21429	318		11.1
0.0193222	3.32571	278	43.0504	6.33613	298		0.268	1.67	288	0.0923	0.048	288		0.266	2.21	288	0.0923	0.048	288		0.837	3.37735	273	1.08	0.459534	273		1.07678	2.53259	288	0.162642	0.0150684	303					4.77419	0.0310651	313		25.2	4.22727	318	0.125	0.0190714	328		15.2
0.0198321	3.3553	278	46.6796	6.4046	298		0.321	1.88	288	0.11	0.0606	288		0.32	2.47	288	0.11	0.0606	288		0.872	3.44874	273	1.12	0.47738	273		1.12876	2.60444	288	0.18263	0.0231148	303					5.30108	0.0399408	313		0.131	0.0475	328	1.18	0.0460714	328		20.2
0.0203908	3.3927	278	50.3084	6.44744	298		0.371	2.05	288	0.145	0.0699	288		0.372	2.66	288	0.145	0.0699	288		0.908	3.5112	273	1.15	0.490765	273		0.048708	0.0807083	303	0.205479	0.0230865	303					5.82796	0.0399408	313		0.596	0.190455	328	3.16	0.207143	328		25.1
0.0207187	3.4757	278	53.9371	6.49028	298		0.476	2.37	288	0.181	0.0919	288		0.423	2.88	288	0.181	0.0919	288		0.943	3.59151	273	1.22	0.517534	273		0.0612015	0.125321	303	0.230739	0.0297754	303					6.3871	0.0399408	313		1.13	0.361364	328	5.15	0.350357	328		0.621
0.0208761	3.50697	278	61.3904	6.55887	298		0.527	2.51	288	0.216	0.104	288		0.473	3.04	288	0.216	0.104	288		0.988	3.65397	273	1.25	0.530918	273		0.0761731	0.175847	303	0.285792	0.0368946	303					6.88172	0.0488166	313		4.98	1.36364	328	10.2	0.707143	328		1.15
0.021511	3.56324	278	68.7452	6.60183	298		0.579	2.65	288	0.252	0.114	288		0.524	3.21	288	0.252	0.114	288		1.01	3.72535	273	1.32	0.562149	273		0.0924824	0.206154	303	0.343958	0.0442939	303					1.58065	0.035503	298		10.2	2.36364	328	15.2	1.15714	328		3.14
0.0221557	3.60158	278	76.1977	6.62771	298		0.632	2.78	288	0.288	0.126	288		0.576	3.37	288	0.288	0.126	288		1.05	3.78781	273	0.0726	0.0190506	298		0.161809	0.347592	303	0.402791	0.0504471	303					2.09677	0.0443787	298		15.2	3.11364	328	20.2	1.58571	328		5.07
0.0226656	3.63118	278	83.4535	6.62795	298		0.684	2.92	288	0.324	0.139	288		0.628	3.53	288	0.324	0.139	288		1.08	3.85027	273	0.107	0.0287767	298		0.185374	0.390602	303	0.474328	0.059075	303					2.62366	0.0488166	298		20.1	3.63636	328	25.2	2.01429	328		8.06
0.0232242	3.66858	278	90.9052	6.61111	298		0.737	3.04	288	0.395	0.183	288		0.679	3.67	288	0.395	0.183	288		1.12	3.90827	273	0.144	0.0352458	298		0.208141	0.431667	303	0.534499	0.0664718	303					3.16129	0.0532544	298		25.2	4.02273	328					11.1
0.023762	3.76397	278	98.3567	6.58572	298		0.79	3.15	288	0.5	0.223	288		0.73	3.82	288	0.5	0.223	288		1.15	3.97073	273	0.177	0.0472919	298		0.231577	0.472731	303	0.587983	0.0713864	303					3.67742	0.0576923	298									15.2
0.0243444	3.80462	278	1.52757	0.950307	313		0.84	3.25	288	0.572	0.226	288		0.784	3.97	288	0.572	0.226	288		1.26	4.16704	273	0.21	0.0548764	298		0.285139	0.559831	303	0.647486	0.078784	303					4.2043	0.0621302	298									20.1
0.0251518	3.85271	278	1.86705	1.06417	313		0.893	3.37	288	0.643	0.267	288		0.836	4.09	288	0.643	0.267	288		1.29	4.22058	273	0.282	0.0740609	298		0.345392	0.653148	303	0.702976	0.0849414	303					4.70968	0.0710059	298									25.2
0.0257022	3.88571	278	2.09405	1.16144	313		0.943	3.47	288	0.714	0.288	288		0.887	4.21	288	0.714	0.288	288		1.33	4.28304	273	0.316	0.0820915	298		0.402295	0.738999	303	0.759137	0.0923431	303					5.23656	0.0710059	298
0.0266732	3.94595	278	2.26581	1.25218	313		0.995	3.57	288	0.821	0.313	288		0.94	4.33	288	0.821	0.313	288		0.142	0.468457	298	0.385	0.0999375	298		0.457188	0.819871	303	0.816633	0.098498	303					5.76344	0.0710059	298
0.0278225	4.01534	278	2.44824	1.35125	313		0.0605	0.409	298	0.889	0.344	288		0.994	4.46	288	0.889	0.344	288		0.281	0.852146	298	0.422	0.109753	298		0.514085	0.899496	303	0.874131	0.107143	303					6.26882	0.0843195	298
0.0283577	4.04664	278	2.6289	1.44109	313		0.107	0.651	298	0.972	0.366	288		0.0161	0.215	298	0.972	0.366	288		0.316	0.941376	298	0.491	0.127599	298		0.570309	0.97414	303	0.930959	0.113299	303					6.80645	0.0798817	298
0.0290091	4.09031	278	2.81062	1.5322	313		0.164	0.919	298	0.995	0.376	288		0.0649	0.593	298	0.995	0.376	288		0.35	1.02168	298	0.835	0.224413	298		0.626533	1.04878	303	0.987787	0.119455	303					7.35484	0.0931953	298
0.030738	4.21415	278	3.012	1.77904	313		0.215	1.12	298	0.0643	0.0373	298		0.124	1.01	298	0.0643	0.0373	298		0.385	1.09753	298	0.87	0.234229	298		0.682755	1.12094	303	1.04127	0.12686	303					7.87097	0.0976331	298
0.0313598	4.24553	278	3.06984	1.64389	313		0.32	1.47	298	0.0744	0.0492	298		0.162	1.27	298	0.0744	0.0492	298		0.42	1.16891	298	0.904	0.242259	298		0.740311	1.1906	303	1.10011	0.134258	303					8.3871	0.0976331	298
0.0329772	4.31631	278	4.25232	2.14463	313		0.371	1.61	298	0.0917	0.0401	298		0.212	1.53	298	0.0917	0.0401	298		0.454	1.24922	298	0.94	0.251182	298		0.797198	1.25902	303	1.13888	0.139191	303					8.91398	0.102071	298
0.0337489	4.35146	278	5.33794	2.51204	313		0.423	1.75	298	0.109	0.058	298		0.268	1.78	298	0.109	0.058	298		0.489	1.3206	298	1.11	0.296243	298		0.853413	1.32495	303	0.161869	0.0173734	313					9.46237	0.110947	298
0.0346783	4.39163	278	6.42257	2.82819	313		0.474	1.88	298	0.145	0.0578	298		0.318	2	298	0.145	0.0578	298		0.524	1.39199	298	1.22	0.326582	298		0.909629	1.39087	303	0.185201	0.0235154	313					9.73118	0.115385	298
0.0355206	4.4276	278	7.60476	3.11872	313		0.527	2.01	298	0.181	0.0606	298		0.369	2.19	298	0.181	0.0606	298		0.559	1.45445	298	1.25	0.336397	298		0.966511	1.45431	303	0.206495	0.0248316	313
0.0362237	4.45937	278	8.68825	3.37506	313		0.579	2.13	298	0.215	0.0694	298		0.42	2.37	298	0.215	0.0694	298		0.593	1.52583	298	1.29	0.343981	298		1.02272	1.5165	303	0.230054	0.0300961	313
0.036792	4.48845	278	9.8693	3.60578	313		0.63	2.23	298	0.251	0.0812	298		0.473	2.55	298	0.251	0.0812	298		0.628	1.58829	298	1.32	0.355581	298		1.08027	1.57745	303	0.285781	0.0384317	313
0.037584	4.52599	278	11.0499	3.81087	313		0.735	2.45	298	0.287	0.078	298		0.524	2.73	298	0.287	0.078	298		0.663	1.64629	298	0.0839	0.00235121	308		1.13046	1.63716	303	0.342866	0.047206	313
0.0384737	4.56879	278	14.2941	4.25525	313		0.787	2.54	298	0.323	0.0988	298		0.576	2.89	298	0.323	0.0988	298		0.697	1.70875	298	0.124	0.00401535	308		0.0695313	0.241998	313	0.40068	0.0529295	313
0.0394273	4.60719	278	17.7326	4.60565	313		0.839	2.63	298	0.394	0.119	298		0.629	3.03	298	0.394	0.119	298		0.734	1.76229	298	0.164	0.0056661	308		0.0913331	0.304753	313	0.456891	0.0606138	313
0.0404826	4.64037	278	21.1699	4.88771	313		0.892	2.72	298	0.201	0.131	298		0.68	3.18	298	0.201	0.131	298		0.767	1.82475	298	0.184	0.00731686	308		0.117102	0.37007	313	0.513765	0.0657367	313
0.0417701	4.67554	278	24.606	5.10995	313		0.943	2.82	298	0.573	0.151	298		0.732	3.32	298	0.573	0.151	298		0.804	1.87829	298	0.207	0.00896761	308		0.140229	0.426422	313	0.570637	0.073421	313
0.0433106	4.71517	278	28.1395	5.29803	313					0.643	0.16	298		0.785	3.45	298	0.643	0.16	298		0.838	1.93183	298	0.233	0.00740609	308		0.163357	0.477651	313	0.626849	0.0798246	313
0.0452153	4.76362	278	31.7702	5.44339	313					0.714	0.193	298		0.836	3.6	298	0.714	0.193	298		0.943	2.09244	298	0.27	0.010663	308		0.185826	0.523757	313	0.683722	0.087509	313
0.0462794	4.79018	278	35.4006	5.57167	313					0.811	0.222	298		0.889	3.72	298	0.811	0.222	298		0.977	2.14152	298	0.299	0.0107076	308		0.208296	0.568582	313	0.739933	0.0939126	313
0.0486517	4.85388	278	38.9327	5.6914	313					0.889	0.222	298		0.941	3.83	298	0.889	0.222	298		1.22	2.48059	298	0.319	0.0107076	308		0.232088	0.614688	313	0.796145	0.100316	313
0.0497861	4.88851	278	42.6604	5.77696	313					0.973	0.242	298		0.992	3.95	298	0.973	0.242	298		1.26	2.53413	298	0.353	0.0107522	308		0.285624	0.705619	313	0.852356	0.108001	313
0.050915	4.92018	278	46.3878	5.85397	313					0.994	0.245	298					0.994	0.245	298		1.29	2.57875	298	0.379	0.0140091	308		0.345111	0.797831	313	0.909229	0.114404	313
0.0529348	4.9698	278	49.919	5.92244	313																1.32	2.62336	298	0.422	0.0140983	308		0.401956	0.882359	313	0.966763	0.120808	313
0.0542523	4.99951	278	53.7442	5.98237	313																0.279	0.575533	308	0.448	0.0157491	308		0.456821	0.956641	313	1.02297	0.128492	313
0.0569866	5.05213	278	61.0998	6.06805	313																0.314	0.629071	308	0.476	0.0141429	308		0.513009	1.03092	313	1.07919	0.136176	313
0.0588283	5.08519	278	76.0057	6.17106	313																0.384	0.753993	308	0.499	0.0173998	308		0.57052	1.10136	313	1.13077	0.143861	313
0.060733	5.12096	278	91.0081	6.18865	313																0.418	0.807531	308	0.525	0.0174445	308		0.62671	1.16668	313
0.0628884	5.1627	278	105.911	6.15496	313																0.453	0.869992	308	0.559	0.0174891	308		0.682901	1.232	313
0.064485	5.19164	278	0.330337	0.307373	343																0.488	0.914607	308	0.594	0.0191398	308		0.740415	1.29475	313
0.0659018	5.2165	278	0.330337	0.307373	343																0.522	0.963683	308	0.622	0.0207906	308		0.796608	1.35495	313
0.0689544	5.26444	278	1.61392	0.538602	343																0.557	1.01722	308	0.665	0.0208352	308		0.852801	1.41258	313
0.0740816	5.33241	278	1.6273	0.541017	343																0.592	1.06184	308	0.699	0.0192737	308		0.909656	1.47021	313
0.0759705	5.35534	278	2.06971	0.624461	343																0.627	1.10645	308	0.725	0.0225306	308		0.966511	1.52528	313
0.078804	5.38973	278	2.5733	0.73403	343																0.661	1.15107	308	0.762	0.0225752	308		1.02271	1.57779	313
0.0816374	5.42411	278	2.88663	0.816315	343																0.696	1.19568	308	0.788	0.0194075	308		1.0789	1.63158	313
0.0835263	5.44704	278	3.25283	0.902899	343																0.731	1.2403	308	0.817	0.0242705	308		1.13047	1.68025	313
0.0883162	5.50271	278	4.51548	1.21224	343																0.765	1.28491	308	0.84	0.0243152	308
0.0950512	5.57042	278	4.64054	1.26217	343																0.8	1.32953	308	0.871	0.0240921	308
0.0974011	5.59259	278	5.59929	1.48567	343																0.835	1.36522	308	0.917	0.0260105	308
0.0998973	5.61673	278	6.87872	1.73348	343																0.87	1.40983	308	0.949	0.0276613	308
0.105905	5.67528	278	8.0596	1.95565	343																0.904	1.44106	308	0.974	0.0277059	308
0.109653	5.70609	278	9.24032	2.16928	343																0.939	1.48568	308	1.01	0.0293567	308
0.112145	5.72177	278	10.4207	2.36583	343																0.974	1.52137	308	1.04	0.0310074	308
0.118015	5.75873	278	13.7633	2.8273	343																1.01	1.55706	308	1.08	0.0278397	308
0.120266	5.7757	278	17.2024	3.20333	343																1.04	1.59275	308	1.11	0.0310966	308
0.122722	5.7945	278	20.5424	3.5281	343																1.08	1.62845	308	1.13	0.0311413	308
0.124901	5.81162	278	24.0773	3.79307	343																1.11	1.66414	308	1.17	0.032792	308
0.128042	5.83682	278	27.6116	4.02387	343																1.15	1.69983	308	1.19	0.0296243	308
0.131696	5.86379	278	34.7767	4.40003	343																1.18	1.7266	308	1.22	0.0360935	308
0.13528	5.88827	278	38.4074	4.54539	343																1.22	1.77121	308	1.28	0.0361827	308
0.138036	5.90659	278	42.136	4.68221	343																1.25	1.80691	308
0.140384	5.92134	278	45.7659	4.78485	343																1.29	1.8426	308
0.146817	5.96003	278	49.4939	4.8875	343																1.32	1.86937	308
0.149176	5.97446	278	53.2213	4.96452	343																0.00198	0.00242259	313
0.151718	5.98989	278	60.578	5.11	343																0.0204	0.0378335	313
0.158831	6.02977	278	68.0321	5.22131	343																0.0714	0.135183	313
0.164144	6.05873	278	75.4858	5.307	343																0.108	0.197198	313
0.173407	6.10516	278	83.0371	5.37559	343																0.143	0.259213	313
0.177695	6.12278	278	90.588	5.41856	343																0.178	0.321228	313
0.180933	6.13478	278	98.0404	5.44444	343																0.212	0.37432	313
0.183445	6.14399	278	105.689	5.45323	343																0.247	0.427411	313
0.186713	6.15796	278																			0.282	0.490765	313
0.192785	6.19602	278																			0.316	0.53538	313
0.200249	6.23901	278																			0.351	0.584456	313
0.202629	6.24862	278																			0.386	0.637994	313
0.204982	6.25621	278																			0.421	0.682609	313
0.208371	6.26718	278																			0.455	0.727224	313
0.21391	6.28763	278																			0.49	0.771839	313
0.21626	6.2998	278																			0.525	0.816454	313
0.219881	6.32177	278																			0.56	0.861069	313
0.226719	6.36337	278																			0.594	0.905684	313
0.231323	6.38286	278																			0.629	0.950299	313
0.233892	6.3913	278																			0.664	0.985991	313
0.239082	6.40409	278																			0.698	1.02168	313
0.247567	6.42006	278																			0.733	1.0663	313
0.251156	6.43046	278																			0.768	1.09753	313
0.260893	6.46525	278																			0.802	1.13322	313
0.266454	6.50366	278																			0.837	1.16891	313
0.273317	6.5433	278																			0.872	1.2046	313
0.276121	6.55248	278																			0.909	1.2403	313
0.278852	6.55866	278																			0.941	1.27599	313
0.281246	6.56453	278																			1.01	1.34737	313
0.28497	6.57404	278																			1.05	1.37414	313
0.289489	6.58743	278																			1.11	1.4366	313
0.292824	6.5977	278																			1.15	1.47229	313
0.295177	6.60713	278																			1.22	1.52583	313
0.30111	6.64174	278																			1.26	1.56152	313
0.309271	6.67332	278																			1.29	1.59275	313
0.3118	6.67544	278																			1.33	1.61952	313
0.314369	6.67818	278
0.317395	6.68275	278
0.32068	6.69072	278
0.324254	6.70145	278
0.326798	6.71307	278
0.330378	6.73222	278
0.337345	6.77377	278
0.339824	6.78285	278
0.343502	6.79357	278
0.347318	6.80247	278
0.349922	6.80739	278
0.354237	6.8153	278
0.360349	6.82261	278
0.364154	6.83818	278
0.368758	6.86696	278
0.376452	6.90758	278
0.379145	6.91006	278
0.382613	6.91112	278
0.385656	6.91401	278
0.389076	6.92123	278
0.393846	6.93355	278
0.396064	6.935	278
0.398876	6.9466	278
0.400562	6.956	278
0.404544	6.9768	278
0.408011	6.99643	278
0.412305	7.01419	278
0.415589	7.02342	278
0.418385	7.02994	278
0.420925	7.03497	278
0.424437	7.0424	278
0.43741	7.05357	278
0.446416	7.10976	278
0.448961	7.1204	278
0.451799	7.12809	278
0.456147	7.13867	278
0.459678	7.14822	278
0.475831	7.16321	278
0.48184	7.20357	278
0.485382	7.22161	278
0.489639	7.2377	278
0.495819	7.25418	278
0.49954	7.26672	278
0.501197	7.26796	278
0.502307	7.27423	278
0.510803	7.27133	278
0.510803	7.27363	278
0.5153	7.28683	278
0.518329	7.29803	278
0.521352	7.31255	278
0.52354	7.3255	278
0.528266	7.35155	278
0.535411	7.34363	278
0.539874	7.30724	278
0.542069	7.3037	278
0.542069	7.4072	278
0.55057	7.32062	278
0.551779	7.36634	278
0.552081	7.36518	278
0.558949	7.40194	278
0.561903	7.37193	278
0.564377	7.42297	278
0.568543	7.41851	278
0.571139	7.42971	278
0.586023	7.50127	278
0.590798	7.48566	278
0.594468	7.49029	278
0.597572	7.5038	278
0.600775	7.5068	278
0.601288	7.54175	278
0.608938	7.49431	278
0.612724	7.54439	278
0.612825	7.54316	278
0.618057	7.57048	278
0.627039	7.59341	278
0.630545	7.59537	278
0.633319	7.59958	278
0.635999	7.60844	278
0.638612	7.6199	278
0.653588	7.67384	278
0.657474	7.67887	278
0.660225	7.68368	278
0.664016	7.6923	278
0.66757	7.69931	278
0.670919	7.70171	278
0.67099	7.6437	278
0.675915	7.71497	278
0.676232	7.74354	278
0.699778	7.71986	278
0.705779	7.73818	278
0.711863	7.73584	278
0.750326	7.86487	278
0.751091	7.89367	278
0.772131	7.93299	278
0.773865	7.93366	278
0.787389	7.94275	278
0.787443	7.94539	278
0.789994	7.96683	278
0.793484	7.99833	278
0.815495	8.03484	278
0.820344	8.03162	278
0.823973	8.03828	278
0.826678	8.04937	278
0.829426	8.06592	278
0.831079	7.98249	278
0.838352	8.0696	278
0.840247	8.0669	278
0.842828	8.06791	278
0.847619	8.08112	278
0.850515	8.09979	278
0.855863	8.11952	278
0.868367	8.07005	278
0.870747	8.0672	278
0.870747	8.18794	278
0.878775	8.16464	278
0.879247	8.18762	278
0.88031	8.09594	278
0.882128	8.11132	278
0.889997	8.19518	278
0.892615	8.19486	278
0.895067	8.19275	278
0.896248	8.16971	278
0.897943	8.14736	278
0.897943	8.14736	278
0.900282	8.19753	278
0.904466	8.20891	278
0.907052	8.21232	278
0.909555	8.21717	278
0.916554	8.23792	278
0.923697	8.23872	278
0.932402	8.24026	278
0.932489	8.24645	278
0.936553	8.27898	278
0.939726	8.28817	278
0.941583	8.23695	278
0.943629	8.30874	278
0.947437	8.29876	278
0.950787	8.30027	278
0.972255	8.3522	278
0.973501	8.32875	278
0.976427	8.33007	278
0.979126	7.04532	278
0.983238	7.05151	278
0.00796827	0.393143	298
0.00873566	0.467859	298
0.00938499	0.597201	298
0.00938499	0.562703	298
0.00938499	0.528205	298
0.00970375	0.672222	298
0.00976345	0.707727	298
0.00985301	0.753039	298
0.0102831	0.785365	298
0.0108186	0.816967	298
0.0124073	0.904115	298
0.0126158	0.953702	298
0.0126864	0.994415	298
0.0131502	1.02633	298
0.0137869	1.05669	298
0.0147685	1.12136	298
0.0150671	1.15849	298
0.0152651	1.19114	298
0.0157644	1.23363	298
0.0162915	1.26523	298
0.017978	1.36953	298
0.0187243	1.40446	298
0.0194538	1.43595	298
0.0205298	1.50899	298
0.0206138	1.56079	298
0.0213427	1.63096	298
0.0220921	1.66769	298
0.0238355	1.74197	298
0.0239502	1.80094	298
0.0242714	1.83748	298
0.0248642	1.86712	298
0.0260517	1.91573	298
0.0269463	1.95611	298
0.0275661	1.98761	298
0.0281948	2.06174	298
0.029227	2.12156	298
0.030288	2.15542	298
0.0320524	2.21773	298
0.0330188	2.29149	298
0.0350039	2.37314	298
0.0354171	2.42372	298
0.0363902	2.46625	298
0.0372777	2.50531	298
0.038286	2.59187	298
0.0390667	2.62848	298
0.0402188	2.67414	298
0.0410131	2.70602	298
0.0425007	2.76713	298
0.0443194	2.83732	298
0.0467803	2.9249	298
0.0475576	2.96253	298
0.0493819	3.06669	298
0.050254	3.09897	298
0.0510815	3.13311	298
0.0527516	3.19254	298
0.0541363	3.22803	298
0.0558667	3.27228	298
0.0572834	3.32027	298
0.05836	3.35101	298
0.0607851	3.41873	298
0.0625905	3.48256	298
0.0639186	3.53508	298
0.0651615	3.58199	298
0.0674703	3.66281	298
0.069674	3.70735	298
0.0729212	3.77862	298
0.074967	3.83136	298
0.076797	3.87431	298
0.0783452	3.90822	298
0.0802207	3.94938	298
0.0827876	4.00218	298
0.0853029	4.05535	298
0.0869107	4.09191	298
0.0914926	4.17594	298
0.0929711	4.20935	298
0.0955684	4.25611	298
0.0984018	4.29654	298
0.100097	4.32481	298
0.101618	4.35356	298
0.102738	4.3802	298
0.103927	4.41131	298
0.109128	4.47107	298
0.113779	4.54053	298
0.115802	4.56057	298
0.118833	4.59458	298
0.120745	4.62283	298
0.123785	4.67647	298
0.126972	4.69791	298
0.131972	4.7482	298
0.133682	4.7749	298
0.135185	4.79791	298
0.137645	4.82629	298
0.144351	4.86743	298
0.146175	4.88786	298
0.148493	4.91959	298
0.150685	4.94885	298
0.15552	4.97384	298
0.157904	4.98002	298
0.163287	5.02926	298
0.16701	5.05555	298
0.17089	5.09293	298
0.17565	5.13492	298
0.178378	5.16635	298
0.181489	5.17957	298
0.186906	5.20189	298
0.190016	5.22588	298
0.195524	5.26098	298
0.197581	5.28848	298
0.205647	5.30985	298
0.210558	5.35972	298
0.214606	5.36969	298
0.218414	5.40566	298
0.221892	5.41869	298
0.226992	5.43575	298
0.230392	5.41837	298
0.235207	5.45843	298
0.240512	5.47465	298
0.244294	5.50584	298
0.248987	5.53623	298
0.257694	5.5208	298
0.333812	5.84367	298
0.353646	5.9119	298
0.37348	5.94564	298
0.393314	6.01386	298
0.413148	6.0476	298
0.432982	6.11583	298
0.45565	6.14945	298
0.498151	6.2513	298
0.523652	6.28481	298
0.54632	6.35293	298
0.568987	6.38655	298
0.594488	6.45456	298
0.619989	6.48807	298
0.644196	6.5408	298
0.67099	6.5896	298
0.696963	6.61926	298
0.724826	6.65651	298
0.749033	6.70924	298
0.775827	6.75803	298
0.801328	6.79155	298
0.829662	6.82495	298
0.852802	6.85472	298
0.879371	6.91119	298
0.908998	6.95987	298
0.931666	6.9935	298
0.957639	7.02316	298
0.985501	7.06041	298
0.00762132	0.198343	343
0.0142648	0.250596	343
0.0178853	0.26483	343
0.0231153	0.277708	343
0.0259133	0.309079	343
0.029219	0.354949	343
0.0320524	0.389337	343
0.0384006	0.449217	343
0.042481	0.50249	343
0.0484121	0.551174	343
0.0506159	0.570692	343
0.0539328	0.618957	343
0.0604457	0.68948	343
0.0647313	0.727304	343
0.0671869	0.760557	343
0.0708153	0.798939	343
0.0750261	0.847648	343
0.0793886	0.884613	343
0.0824769	0.916516	343
0.0876641	0.977075	343
0.0899803	0.999915	343
0.0926426	1.01815	343
0.0950962	1.04236	343
0.101353	1.09358	343
0.106619	1.13218	343
0.108582	1.15404	343
0.112144	1.19407	343
0.115841	1.23623	343
0.119782	1.26941	343
0.123962	1.29998	343
0.127417	1.32779	343
0.130143	1.34702	343
0.132707	1.37685	343
0.142263	1.47912	343
0.14508	1.50058	343
0.149073	1.53704	343
0.153323	1.58173	343
0.157349	1.61894	343
0.159321	1.63746	343
0.164657	1.69649	343
0.167438	1.70964	343
0.171586	1.72875	343
0.177033	1.77269	343
0.179351	1.7913	343
0.182623	1.81863	343
0.18652	1.85138	343
0.188654	1.87101	343
0.190927	1.89156	343
0.195694	1.93186	343
0.198213	1.95476	343
0.201572	1.98431	343
0.204122	1.9978	343
0.208545	2.01291	343
0.211179	2.02813	343
0.215778	2.06822	343
0.218035	2.08692	343
0.221538	2.11985	343
0.227276	2.15383	343
0.230392	2.18246	343
0.233452	2.20752	343
0.237449	2.23419	343
0.243208	2.2669	343
0.24771	2.29145	343
0.249867	2.30705	343
0.25418	2.345	343
0.256332	2.36183	343
0.25942	2.37981	343
0.261572	2.39644	343
0.265338	2.43295	343
0.26808	2.44586	343
0.271469	2.45981	343
0.274576	2.4793	343
0.277395	2.50112	343
0.28392	2.54252	343
0.286008	2.55745	343
0.288501	2.57205	343
0.29293	2.59872	343
0.295561	2.61864	343
0.298017	2.63867	343
0.304392	2.66717	343
0.311832	2.72348	343
0.314813	2.73826	343
0.318484	2.7531	343
0.322101	2.77228	343
0.327107	2.80659	343
0.329846	2.83063	343
0.333175	2.84947	343
0.34091	2.87111	343
0.343729	2.89276	343
0.346185	2.91279	343
0.349396	2.92704	343
0.355023	2.95678	343
0.360612	3.00279	343
0.364665	3.00606	343
0.36872	3.02458	343
0.370694	3.05041	343
0.379996	3.07809	343
0.382201	3.09299	343
0.389306	3.13362	343
0.392862	3.14221	343
0.395919	3.14899	343
0.402287	3.18086	343
0.408521	3.22086	343
0.413252	3.22149	343
0.419199	3.2722	343
0.423065	3.2893	343
0.426253	3.2978	343
0.431585	3.30346	343
0.437154	3.35104	343
0.441971	3.36964	343
0.445025	3.38619	343
0.45029	3.4133	343
0.460518	3.43404	343
0.462733	3.4775	343
0.466541	3.4941	343
0.474344	3.49387	343
0.476657	3.50449	343
0.478695	3.5202	343
0.482567	3.53136	343
0.485227	3.5393	343
0.489226	3.56025	343
0.491446	3.57586	343
0.498073	3.61413	343
0.501205	3.61726	343
0.504527	3.62825	343
0.51002	3.64701	343
0.514106	3.66053	343
0.517631	3.67744	343
0.520105	3.69073	343
0.522856	3.70848	343
0.530027	3.75376	343
0.532854	3.7306	343
0.535857	3.73857	343
0.5385	3.76652	343
0.538682	3.76219	343
0.542069	3.75042	343
0.547736	3.8192	343
0.555449	3.81147	343
0.556237	3.84187	343
0.55907	3.81876	343
0.565681	3.88175	343
0.569809	3.85678	343
0.57182	3.87576	343
0.576071	3.8871	343
0.580163	3.91185	343
0.59033	3.92176	343
0.595905	3.95533	343
0.59862	3.96816	343
0.605192	3.96647	343
0.656952	4.1035	343
0.676786	4.17173	343
0.716454	4.27369	343
0.756122	4.34115	343
0.778789	4.40927	343
0.778918	4.41397	343
0.843958	4.54475	343
0.892127	4.64638	343
0.914923	4.6847	343
0.940295	4.71351	343
0.940424	4.71821	343
0.962962	4.78163	343
0.988463	4.81514	343
0.988592	4.81984	343
[truncated: 47 more columns]
