# Supplementary material for: Exploring the limits of adsorption-based CO2 capture using MOFs with PVSA – from molecular design to process economics
Source: Royal Society of Chemistry journal article supplement (doi:10.1039/c9me00102f), 2019-09-23
Supplement: c9me00102f3.xlsx [file c9me00102f3.xlsx]

## Sheet: Introduction
	Associated content for:
	Exploring the limits of adsorption-based CO2 capture using MOFs with PVSA – from molecular design to process economics
	D. Danaci, M. Bui, N. Mac Dowell, C. Petit
	Surrogate Model
	Scope
	1	Desorption pressure fixed at 0.01 bar(a)
	2	Adsorbent physical properties fixed to UTSA-16
		See sensitivity analysis in main paper for implications
	3	Single-site Langmuir isotherms only
		1 ≤ mmax ≤ 16
		24000 ≤ ΔHCO2 ≤ 60000
		11000 ≤ ΔHN2 ≤ 20000
	Use instructions
	1	Fit CO2 and N2 isotherm data simultaneously to simplified SSL equation
		Minimum 2 temperatures required for each, ideally 3 - above 20 °C
		mmax in mol/kg, ΔH in J/mol, P in bar
	2	Ensure fit is appropriate for pressure range of interest
		N2 data must be fit well up to at least 1 bar(a)
		CO2 data must be fit well up to at least 0.40 bar(a)
	3	Input the 3 fitting parameters in to "Model" sheet
		Ensure all parameters are within the range defined in the scope above

## Sheet: Model
	Associated content for:
	Exploring the limits of adsorption-based CO2 capture using MOFs with PVSA – from molecular design to process economics
	D. Danaci, M. Bui, N. Mac Dowell, C. Petit
	Surrogate Model
	Input parameters
	mmax	4.16	mol/kg	1 ≤ mmax ≤ 16
	ΔHCO2	30400	J/mol	24000 ≤ ΔHCO2 ≤ 60000
	ΔHN2	17800	J/mol	11000 ≤ ΔHN2 ≤ 20000
	Model output								Units
				Purity	Recovery	Capture Cost			Purity		CO2 molar fraction
	Natural gas scenario			0.712678	0.816626	385.504			Recovery		CO2 molar fraction
	Coal scenario			0.853422	0.926876	277.817			Capture Cost		£/t - CEPCI = 616.3
	Cement scenario			0.890728	0.950964	250.916
	Steel scenario			0.901221	0.957159	247.652

## Sheet: Calculations
m	4.16
dHCO2	30400	30.4
dHN2	17800	17.8
NGCC Purity									NGCC Recovery									NGCC Cost
dHCO2		dHN2							dHCO2		dHN2							dHCO2		dHN2
min	max	min	max	out	chk1	chk2	select		min	max	min	max	out	chk1	chk2	select		min	max	min	max	out	chk1	chk2	select					Pur	Rec	ACC
24	30	11	14	0.741202	0	0	0		24	30	11	15	0.801892	0	0	0		24	30	11	14	484.128	0	0	0				NGCC	0.712678	0.816626	385.504
24	30	14	16	0.749712	0	0	0		24	30	15	17	0.807074	0	0	0		24	30	14	17	364.642	0	0	0				PC	0.853422	0.926876	277.817
24	30	16	18	0.721925	0	1	0		24	30	17	20	0.828992	0	1	0		24	30	17	20	350.852	0	1	0				Cement	0.890728	0.950964	250.916
24	30	18	20	0.709947	0	0	0		30	36	11	16	0.806214	1	0	0		30	36	11	14	411.176	1	0	0				Steel	0.901221	0.957159	247.652
30	36	11	14	0.75591	1	0	0		30	36	16	20	0.816626	1	1	0.816626		30	36	14	17	364.203	1	0	0
30	36	14	16	0.663014	1	0	0		36	42	11	16	0.809037	0	0	0		30	36	17	20	385.504	1	1	385.504
30	36	16	18	0.712678	1	1	0.712678		36	42	16	20	1.01391	0	1	0		36	42	11	14	433.736	0	0	0
30	36	18	20	0.710529	1	0	0		42	48	11	16	0.764258	0	0	0		36	42	14	17	332.531	0	0	0
36	42	11	14	0.814336	0	0	0		42	48	16	18	0.776449	0	1	0		36	42	17	20	573.618	0	1	0
36	42	14	16	0.813727	0	0	0		42	48	18	20	0.962762	0	0	0		42	50	11	14	5833.15	0	0	0
36	42	16	18	0.805736	0	1	0		48	54	11	16	0.731266	0	0	0		42	50	14	17	1152.86	0	0	0
36	42	18	20	0.84597	0	0	0		48	54	16	18	-0.30506	0	1	0		42	50	17	20	-1502.77	0	1	0
42	48	11	14	0.770584	0	0	0		48	54	18	20	9.53966	0	0	0		50	54	11	14	-46494.8	0	0	0
42	48	14	16	0.519419	0	0	0		54	60	11	15	21.5901	0	0	0		50	54	14	17	-33365.5	0	0	0
42	48	16	18	0.25809	0	1	0		54	60	15	17	3.11035	0	0	0		50	54	17	20	8367.54	0	1	0
42	48	18	20	1.3315	0	0	0		54	60	17	20	-39.6351	0	1	0		54	60	11	14	-146244	0	0	0
48	54	11	14	-5.3439	0	0	0											54	60	14	17	3009.46	0	0	0
48	54	14	16	-2.66375	0	0	0											54	60	17	20	75746.2	0	1	0
48	54	16	18	2.02876	0	1	0
48	54	18	20	1.86529	0	0	0
54	60	11	14	9.39862	0	0	0
54	60	14	16	6.81924	0	0	0
54	60	16	18	2.72249	0	1	0
54	60	18	20	0.605889	0	0	0
PC Purity									PC Recovery									PC Cost
dHCO2		dHN2							dHCO2		dHN2							dHCO2		dHN2
min	max	min	max	out	chk1	chk2	select		min	max	min	max	out	chk1	chk2	select		min	max	min	max	out	chk1	chk2	select
24	30	11	14	0.851747	0	0	0		24	30	11	14	0.931098	0	0	0		24	30	11	14	278.113	0	0	0
24	30	14	16	0.836422	0	0	0		24	30	14	16	0.920532	0	0	0		24	30	14	16	294.031	0	0	0
24	30	16	18	0.848131	0	1	0		24	30	16	18	0.923201	0	1	0		24	30	16	18	278.974	0	1	0
24	30	18	20	0.858368	0	0	0		24	30	18	20	0.939175	0	0	0		24	30	18	20	273.272	0	0	0
30	36	11	14	0.870609	1	0	0		30	36	11	14	0.915811	1	0	0		30	36	11	14	271.052	1	0	0
30	36	14	16	0.880214	1	0	0		30	36	14	16	0.93234	1	0	0		30	36	14	16	275.189	1	0	0
30	36	16	18	0.853422	1	1	0.853422		30	36	16	18	0.926876	1	1	0.926876		30	36	16	18	277.817	1	1	277.817
30	36	18	20	0.850948	1	0	0		30	36	18	20	0.923317	1	0	0		30	36	18	20	287.63	1	0	0
36	42	11	14	0.688589	0	0	0		36	42	11	14	0.917058	0	0	0		36	42	11	14	325.686	0	0	0
36	42	14	16	0.734192	0	0	0		36	42	14	16	0.915105	0	0	0		36	42	14	16	256.941	0	0	0
36	42	16	18	0.878532	0	1	0		36	42	16	18	0.915176	0	1	0		36	42	16	18	217.599	0	1	0
36	42	18	20	0.809914	0	0	0		36	42	18	20	0.925283	0	0	0		36	42	18	20	200.964	0	0	0
42	48	11	14	1.39539	0	0	0		42	48	11	14	0.856958	0	0	0		42	48	11	14	-269.587	0	0	0
42	48	14	16	0.708949	0	0	0		42	48	14	16	0.812422	0	0	0		42	48	14	16	1855.09	0	0	0
42	48	16	18	0.141901	0	1	0		42	48	16	18	0.802771	0	1	0		42	48	16	18	321.724	0	1	0
42	48	18	20	0.426888	0	0	0		42	48	18	20	1.84781	0	0	0		42	48	18	20	-317.93	0	0	0
48	54	11	14	6.56048	0	0	0		48	54	11	14	1.57766	0	0	0		48	54	11	14	11976.4	0	0	0
48	54	14	16	3.24568	0	0	0		48	54	14	16	-25.1058	0	0	0		48	54	14	16	-12558.3	0	0	0
48	54	16	18	2.54228	0	1	0		48	54	16	18	6.4987	0	1	0		48	54	16	18	1747.8	0	1	0
48	54	18	20	5.83124	0	0	0		48	54	18	20	-30.5938	0	0	0		48	54	18	20	1285.06	0	0	0
54	60	11	14	4.31663	0	0	0		54	60	11	14	3.93577	0	0	0		54	60	11	14	14619.1	0	0	0
54	60	14	16	-2.93985	0	0	0		54	60	14	16	15.9308	0	0	0		54	60	14	16	-41348.7	0	0	0
54	60	16	18	3.10917	0	1	0		54	60	16	18	15.3474	0	1	0		54	60	16	18	39329.3	0	1	0
54	60	18	20	1.96366	0	0	0		54	60	18	20	10.2099	0	0	0		54	60	18	20	49513.4	0	0	0
Cement Purity									Cement Recovery									Cement Cost
dHCO2		dHN2							dHCO2		dHN2							dHCO2		dHN2
min	max	min	max	out	chk1	chk2	select		min	max	min	max	out	chk1	chk2	select		min	max	min	max	out	chk1	chk2	select
24	30	11	14	0.892656	0	0	0		24	30	11	14	0.940497	0	0	0		24	30	11	14	249.702	0	0	0
24	30	14	16	0.881775	0	0	0		24	30	14	16	0.9455	0	0	0		24	30	14	16	252.514	0	0	0
24	30	16	18	0.885799	0	1	0		24	30	16	18	0.951053	0	1	0		24	30	16	18	251.908	0	1	0
24	30	18	20	0.898417	0	0	0		24	30	18	20	0.960501	0	0	0		24	30	18	20	249.711	0	0	0
30	36	11	14	0.913784	1	0	0		30	36	11	14	0.941723	1	0	0		30	36	11	14	246.655	1	0	0
30	36	14	16	0.897899	1	0	0		30	36	14	16	0.95462	1	0	0		30	36	14	16	249.381	1	0	0
30	36	16	18	0.890728	1	1	0.890728		30	36	16	18	0.950964	1	1	0.950964		30	36	16	18	250.916	1	1	250.916
30	36	18	20	0.888885	1	0	0		30	36	18	20	0.94857	1	0	0		30	36	18	20	255.244	1	0	0
36	42	11	14	0.668043	0	0	0		36	42	11	14	0.944878	0	0	0		36	42	11	14	270.593	0	0	0
36	42	14	16	0.759261	0	0	0		36	42	14	16	0.942448	0	0	0		36	42	14	16	311.223	0	0	0
36	42	16	18	0.876483	0	1	0		36	42	16	18	0.942135	0	1	0		36	42	16	18	197.3	0	1	0
36	42	18	20	0.832716	0	0	0		36	42	18	20	0.977361	0	0	0		36	42	18	20	170.36	0	0	0
42	48	11	14	0.483857	0	0	0		42	18	11	14	0.854118	0	0	0		42	48	11	14	-304.348	0	0	0
42	48	14	16	0.568604	0	0	0		42	48	14	16	0.926526	0	0	0		42	48	14	16	1609.55	0	0	0
42	48	16	18	0.310956	0	1	0		42	48	16	18	0.226474	0	1	0		42	48	16	18	293.661	0	1	0
42	48	18	20	0.408937	0	0	0		42	48	18	20	5.5374	0	0	0		42	48	18	20	-186.679	0	0	0
48	54	11	14	5.84952	0	0	0		48	54	11	14	5.81981	0	0	0		48	54	11	14	7388.7	0	0	0
48	54	14	16	3.32348	0	0	0		48	54	14	16	-32.6898	0	0	0		48	54	14	16	-5976.58	0	0	0
48	54	16	18	-0.0226892	0	1	0		48	54	16	18	-31.8314	0	1	0		48	54	16	18	4973.35	0	1	0
48	54	18	20	5.50851	0	0	0		48	50	18	20	-126.948	0	0	0		48	54	18	20	10884	0	0	0
54	60	11	14	2.37327	0	0	0		50	54	18	20	5.42625	0	0	0		54	60	11	14	-5144.74	0	0	0
54	60	14	16	1.94633	0	0	0		54	56	11	14	-63.4663	0	0	0		54	60	14	16	-9434.77	0	0	0
54	60	16	18	3.54299	0	1	0		56	60	11	14	-15.702	0	0	0		54	60	16	18	-2997.67	0	1	0
54	60	18	20	1.13701	0	0	0		54	60	14	16	-3546.27	0	0	0		54	60	18	20	27553.9	0	0	0
									54	60	16	18	12.856	0	1	0
									54	60	18	20	4.32206	0	0	0
Steel Purity									Steel Recovery									Steel Cost
dHCO2		dHN2							dHCO2		dHN2							dHCO2		dHN2
min	max	min	max	out	chk1	chk2	select		min	max	min	max	out	chk1	chk2	select		min	max	min	max	out	chk1	chk2	select
24	30	11	14	0.910214	0	0	0		24	30	11	14	0.947322	0	0	0		24	30	11	14	244.463	0	0	0
24	30	14	16	0.882502	0	0	0		24	30	14	16	0.95258	0	0	0		24	30	14	16	252.001	0	0	0
24	30	16	18	0.900549	0	1	0		24	30	16	18	0.956028	0	1	0		24	30	16	18	248.743	0	1	0
24	30	18	20	0.902519	0	0	0		24	30	18	20	0.954059	0	0	0		24	30	18	20	247.096	0	0	0
30	36	11	14	0.906914	1	0	0		30	36	11	14	0.947953	1	0	0		30	36	11	14	244.195	1	0	0
30	36	14	16	0.911289	1	0	0		30	36	14	16	0.960787	1	0	0		30	36	14	16	245.528	1	0	0
30	36	16	18	0.901221	1	1	0.901221		30	36	16	18	0.957159	1	1	0.957159		30	36	16	18	247.652	1	1	247.652
30	36	18	20	0.903226	1	0	0		30	36	18	20	0.956557	1	0	0		30	36	18	20	248.065	1	0	0
36	42	11	14	0.686401	0	0	0		36	42	11	14	0.949861	0	0	0		36	42	11	14	293.54	0	0	0
36	42	14	16	0.98754	0	0	0		36	42	14	16	0.948204	0	0	0		36	42	14	16	221.257	0	0	0
36	42	16	18	0.887405	0	1	0		36	42	16	18	0.942198	0	1	0		36	42	16	18	228.004	0	1	0
36	42	18	20	0.865295	0	0	0		36	42	18	20	1.00378	0	0	0		36	42	18	20	163.091	0	0	0
42	48	11	14	0.698099	0	0	0		42	48	11	14	0.986464	0	0	0		42	48	11	14	1032.25	0	0	0
42	48	14	16	0.838354	0	0	0		42	48	14	16	0.456481	0	0	0		42	48	14	16	222.953	0	0	0
42	48	16	18	0.707014	0	1	0		42	48	16	18	-3.47624	0	1	0		42	48	16	18	-485.245	0	1	0
42	48	18	20	-0.0636384	0	0	0		42	48	18	20	1.65727	0	0	0		42	48	18	20	-608.458	0	0	0
48	52	11	14	4.49708	0	0	0		48	52	11	14	-5.63266	0	0	0		48	52	11	14	4637.25	0	0	0
48	52	14	16	8.08132	0	0	0		48	52	14	16	-77.1851	0	0	0		48	52	14	16	3952.84	0	0	0
48	52	16	18	5.34126	0	1	0		48	52	16	18	100.463	0	1	0		48	52	16	18	10841.2	0	1	0
48	52	18	20	0.211026	0	0	0		48	52	18	20	140.344	0	0	0		48	52	18	20	8490.42	0	0	0
52	56	11	14	8.62132	0	0	0		52	56	11	14	49.431	0	0	0		52	56	11	14	-3870.71	0	0	0
52	56	14	16	3.84322	0	0	0		52	56	14	16	5.83769	0	0	0		52	56	14	16	-2646.95	0	0	0
52	56	16	18	-6.61845	0	1	0		52	56	16	18	8.47897	0	1	0		52	56	16	18	20759.1	0	1	0
52	56	18	20	-10.2179	0	0	0		52	56	18	20	-5.62075	0	0	0		52	56	18	20	24120.3	0	0	0
56	60	11	14	-5.60316	0	0	0		56	60	11	14	0.955811	0	0	0		56	60	11	14	-8037.4	0	0	0
56	60	14	16	-4.63327	0	0	0		56	60	14	16	-14.7607	0	0	0		56	60	14	16	2350.67	0	0	0
56	60	16	18	0.826701	0	1	0		56	60	16	18	3.55646	0	1	0		56	60	16	18	10320.3	0	1	0
56	60	18	20	-0.340649	0	0	0		56	60	18	20	-0.821578	0	0	0		56	60	18	20	-4732.59	0	0	0
